# Supplementary material
Source: publisher site journal article supplement (https://www.dovepress.com/get_supplementary_file.php?f=248741.docx)
Supplement: Supplementary file 1 [file get_supplementary_file.php]

**Supplementary Table 1 Primers used in RT-PCR**

| Genes | Primer sequences |
| --- | --- |
| IL-6 | **Forward:** 5'-ATAGTCCTTCCTACCCCAATTTCC-3'  **Reverse:** 5'-GATGAATTGGATGGTCTTGGTCC-3' |
| TNF-α | **Forward**: 5'-CTGAACTTCGGGGTGATCGG-3'  **Reverse:** 5’-GGCTTGTCACTCGAATTTTGAGA-3’ |
| iNOS | **Forward**: 5’-CGAAACGCTTCACTTCCAA-3’  **Reverse:** 5’- TGAGCCTATATTGCTGTGGCT-3’ |
| IL-1β | **Forward:** 5'-TGGAGAGTGTGGATCCCAAG -3'  **Reverse:** 5'-GGTGCTGATGTACCAGTTGG -3' |
| ALP | **Forward**: 5'-CGTGGCTAAGAATGTCATCATGTT-3'  **Reverse**: 5'-TGGTGGAGCTGACCCTTGA-3' |
| Col-I | **Forward:** 5'-CCCTGGAAAGAATGGAGATGAT-3'  **Reverse:** 5'-ACCATCCAAACCACTGAAACCT-3' |
| Runx2 | **Forward:** 5'-CATGGCGGGTAACGATGAA-3'  **Reverse:** 5'-AGACGGTTATGGTCAAGGTGAAA-3' |
| BMP-2 | **Forward:**5'-CTGAACTCCACTAATCATGC-3'  **Reverse:** 5'-ACAACCTTTTCATTCTCGTC-3' |
| GAPDH | **Forward:** 5’-TCAGCAATGCCTCCTGCAC -3’  **Reverse:** 5’-TCTGGGTGGCAGTGATGGC -3’ |

**Supplementary Figure legends**

**Supplementary Figure 1.** Analysis of exosome protein concentration using the Pierce BCA Protein assay kit. Error bars denote mean ± SD of five wells.

**Supplementary Figure 2. Proliferation of hBMSCs cultured with PCL/PDA, PCL/PDA + GSNO, PCL/PDA + exosome, and PCL/PDA + GSNO + exosome scaffolds for 3 days.** (A) Toxicity of different scaffolds determined by XTT cell viability assay. Results are mean ± SD (n =3).

**Supplementary Figure 1**

**
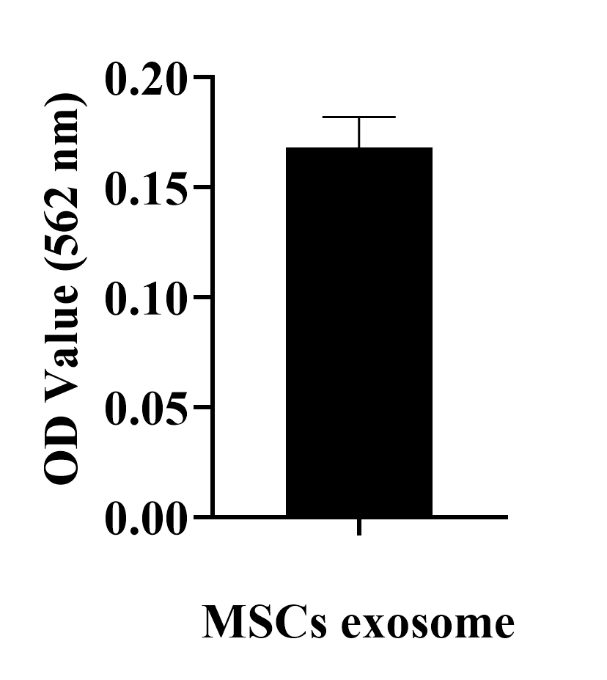
**

**Supplementary Figure 2**

**
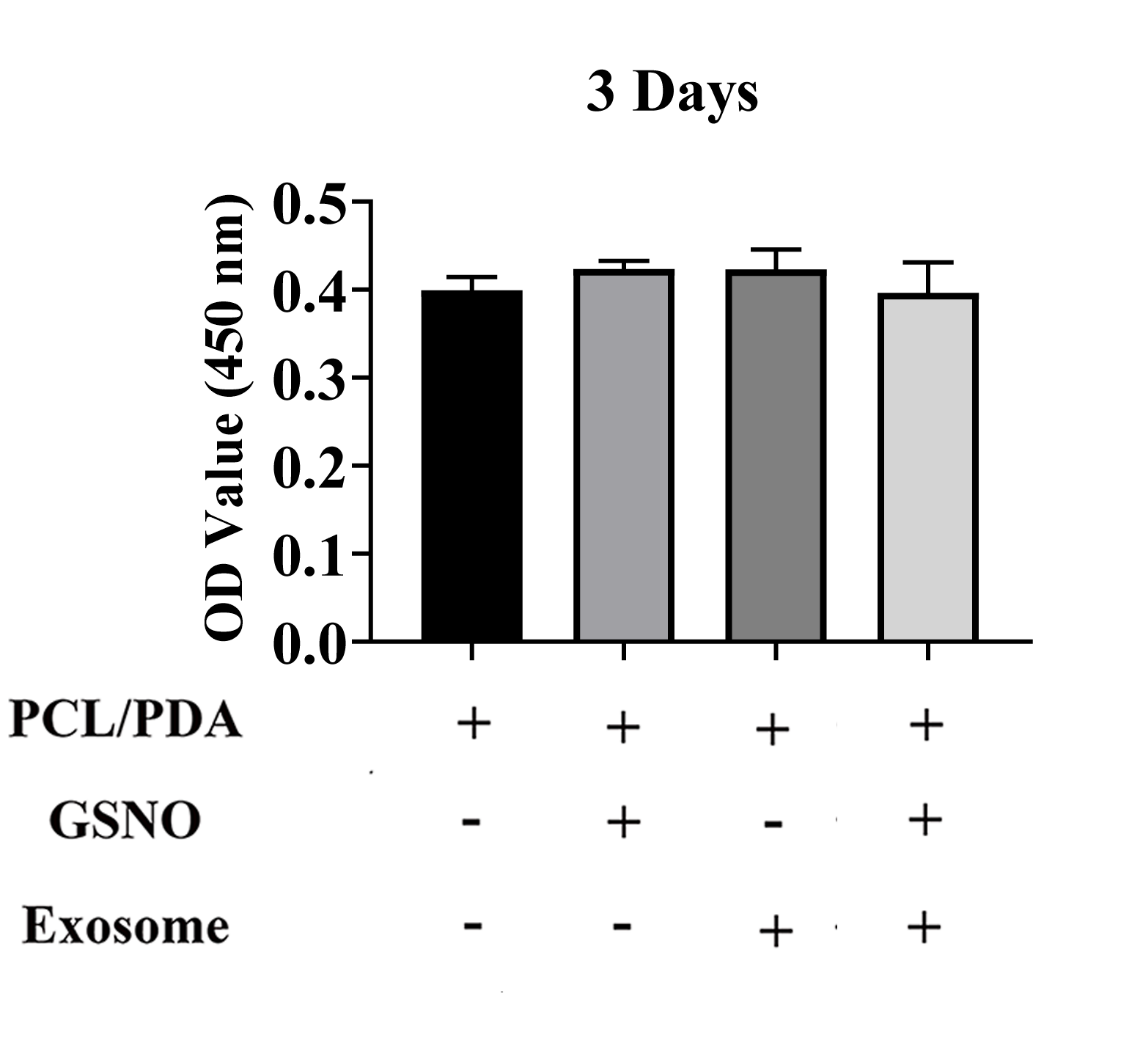
**
